# Supplementary material for: Does State Dependence Matter in Relation to Oil Price Shocks on Global Economic Conditions?
Source: publisher site journal article supplement (doi:10.1515/snde-2023-0018), 2024-04-10
Supplement: Supplementary file 1 [file replication_data.xlsx]

## Sheet: variable_definition
variable	definition	source
CPIAUCSL	U.S. CPI	FRED
OECDPRINTO01IXOBSAM	OECD industrial production	FRED
WUIGLOBALWEIGHTAVG	WUI	FRED
p_c	OECD CPI	OECD
doil_y	Year-on-year logarithm difference of global oil production	Author's calculation (based on EIA data)
oil_y	Logarithm of global oil production	Author's calculation (based on EIA data)
OECD_gap	OECD Output Gap	Author's calculation (based on HP filter)
dOECD	Year-on-year change of logarithm of OECD industrial production	Author's calculation (based on FRED data)
dwui	Year-on-year change of logarithm of WUI	Author's calculation (based on FRED data)
impact_doecd	7-quarter centered moving average year-on-year output growth	Author's calculation (based on FRED data)
impact_oecd_gap	7-quarter centered moving average year-on-year output growth	Author's calculation (based on FRED data, HP filter)
p_o_a	Real price of oil	Author's calculation (based on FRED data)
dp_oecd	Year-on-year CPI Inflation for OECD	Author's calculation (based on OECD data)
doil	Year-on-year Oil Inflation	Author's calculation (based on FRED data)
WUI	Logarithm of WUI	Author's calculation (based on FRED data)
oecd_log	Logarithm of OECD industrial production	Author's calculation (based on FRED data)

## Sheet: data
dates	CPIAUCSL	OECDPRINTO01IXOBSAM	WUIGLOBALWEIGHTAVG	p_c	doil_y	oil_y	OECD_gap	dOECD	dwui	impact_doecd	impact_oecd_gap	p_o_a	dp_oecd	doil	WUI	oecd_log
1990 Q1	128.6	66.8775	12496.5	3.75088	4.78731	11.0252	0.0203578	2.35876		2.46681	0.016416	1	6.76499	-3.18423	9.4332	4.20286
1990 Q2	129.9	67.1508	8769.97	3.7666	3.55028	11.0211	0.0218219	2.35099		1.85958	0.0155934	0.812528	6.49386	-19.5371	9.07909	4.20694
1990 Q3	132.5	67.5263	16198.8	3.78674	-1.95198	10.9852	0.0248814	2.87885		1.37423	0.0153002	1.58583	7.29445	54.4178	9.69269	4.21252
1990 Q4	134.2	67.1797	11872.3	3.80251	-1.63665	11.0099	0.0172895	1.32752		0.908414	0.0137372	1.30131	7.4363	25.2438	9.38196	4.20737
1991 Q1	134.8	66.4328	8223.55	3.81946	-1.44348	11.0108	0.00369026	-0.66709	-41.8444	0.469268	0.0108362	0.954083	6.85822	-4.70048	9.01476	4.19619
1991 Q2	136	66.6659	10483.8	3.83365	-3.36582	10.9875	0.0047424	-0.724806	17.8499	0.244256	0.00784643	0.898198	6.70533	10.024	9.25759	4.19969
1991 Q3	137	66.7439	6208.32	3.84627	1.80832	11.0032	0.00337743	-1.16533	-95.9048	-0.145182	0.00357803	0.932045	5.95245	-53.148	8.73365	4.20086
1991 Q4	138.2	66.7009	7314.13	3.86145	0.530962	11.0152	5.07251e-05	-0.715261	-48.4397	-0.322722	-3.50359e-05	0.873148	5.89369	-39.9024	8.89756	4.20022
1992 Q1	139.1	66.9503	12616.9	3.8774	-0.0575275	11.0102	0.000893312	0.775907	42.8035	-0.384893	-0.00404865	0.894853	5.79383	-6.40912	9.44279	4.20395
1992 Q2	140.1	66.7678	7358.84	3.88723	0.554713	10.993	-0.00499746	0.152781	-35.3931	-0.469687	-0.00860741	0.998191	5.35861	10.5554	8.90366	4.20122
1992 Q3	141.1	66.8005	6777.61	3.89697	-0.466449	10.9986	-0.00800193	0.084741	8.7734	-0.434118	-0.0134759	0.91028	5.07061	-2.36287	8.82138	4.20171
1992 Q4	142.3	65.9697	13982.4	3.90692	-0.189009	11.0133	-0.0244051	-1.10229	64.7989	-0.346371	-0.0173962	0.869597	4.54744	-0.407569	9.54555	4.1892
1993 Q1	143.3	66.0734	13705.7	3.923	0.18112	11.012	-0.0271689	-1.31837	8.27761	-0.195312	-0.0212967	0.914813	4.55926	2.20605	9.52557	4.19077
1993 Q2	144.3	66.1588	10558.9	3.93248	0.222673	10.9952	-0.0307017	-0.91634	36.1067	0.225547	-0.0232297	0.803672	4.52421	-21.6753	9.26472	4.19206
1993 Q3	145	66.733	15698.9	3.94211	0.289043	11.0015	-0.0273917	-0.10103	83.9965	0.879514	-0.0232889	0.703451	4.51351	-25.7754	9.66134	4.2007
1993 Q4	146.3	67.1903	11880.1	3.95116	-0.193869	11.0114	-0.0264099	1.83332	-16.2934	1.77832	-0.0200518	0.651038	4.42403	-28.9461	9.38262	4.20753
1994 Q1	147.1	68.153	9655.85	3.96468	0.648294	11.0185	-0.0185288	3.0988	-35.0249	2.93186	-0.0142948	0.649058	4.16821	-34.3198	9.17532	4.22175
1994 Q2	147.9	69.3165	9446.24	3.9791	2.02426	11.0155	-0.00841603	4.6625	-11.1353	3.77468	-0.00966965	0.772236	4.66237	-3.99018	9.15337	4.23868
1994 Q3	149.3	70.2875	12937.1	3.9906	1.54579	11.0169	-0.00174581	5.18939	-19.3488	4.3418	-0.00586923	0.702504	4.84887	-0.134763	9.46786	4.25259
1994 Q4	150.1	71.8868	8478.32	4.00216	2.34352	11.0348	0.0131306	6.75638	-33.7351	4.48653	-0.00289605	0.727051	5.10045	11.0428	9.04527	4.27509
1995 Q1	151.2	71.6354	11010.1	4.02238	1.50666	11.0335	0.00167417	4.98338	13.1246	4.36454	6.14463e-05	0.797162	5.77039	20.5536	9.30657	4.27159
1995 Q2	152.4	72.0507	9926.97	4.04028	2.1444	11.0369	-0.000788756	3.86882	4.96393	4.01276	-0.000258712	0.767664	6.11756	-0.593751	9.20301	4.27737
1995 Q3	153.1	72.317	8000.67	4.05258	2.9578	11.0465	-0.00559771	2.84646	-48.0577	3.70154	-0.0008345	0.710482	6.19827	1.12927	8.98728	4.28106
1995 Q4	153.9	73.5187	11781.5	4.06445	1.53271	11.0501	0.00217368	2.24482	32.902	3.26099	-0.00336168	0.786896	6.22854	7.90993	9.37429	4.29754
1996 Q1	155.5	73.2289	10781	4.08333	2.44298	11.058	-0.0106571	2.20008	-2.10296	3.02655	-0.00367186	0.867794	6.09458	8.48968	9.28554	4.29359
1996 Q2	156.7	74.2531	11799.2	4.09629	2.0997	11.0579	-0.00577632	3.01084	17.2776	3.23715	-0.00263492	0.812155	5.60101	5.63385	9.37579	4.30748
1996 Q3	157.7	75.0222	9862.25	4.10672	1.47777	11.0613	-0.00455968	3.67252	20.9189	3.62396	8.79733e-05	0.903948	5.41379	24.0829	9.19647	4.31778
1996 Q4	159.1	76.0175	8467.4	4.11872	2.76013	11.0777	-0.000497064	3.34228	-33.0309	4.12578	0.00219549	0.998959	5.42667	23.8618	9.04398	4.33096
1997 Q1	159.8	77.2479	8311.31	4.13204	3.04877	11.0885	0.0064698	5.34302	-26.0164	4.55894	0.0060254	0.84458	4.87107	-2.71145	9.02537	4.34702
1997 Q2	160.2	78.4939	11003.6	4.14258	2.96733	11.0876	0.0134625	5.55417	-6.98129	4.68932	0.00836916	0.778322	4.62966	-4.25509	9.30597	4.36302
1997 Q3	161.2	79.4684	8718.84	4.15511	3.26483	11.0939	0.0169263	5.75755	-12.3227	4.46113	0.0090041	0.727826	4.83957	-21.6711	9.07324	4.37536
1997 Q4	161.8	80.1007	6869.11	4.16576	2.97639	11.1075	0.0161523	5.2322	-20.9189	4.20569	0.00893167	0.715058	4.7039	-33.4349	8.83479	4.38329
1998 Q1	162	80.339	13808.1	4.17819	3.75446	11.126	0.01063	3.92352	50.7641	3.53237	0.00656731	0.568574	4.6151	-39.5708	9.53301	4.38625
1998 Q2	162.8	80.1398	9724.48	4.18681	3.05133	11.1181	-0.000115087	2.0752	-12.3572	3.02608	0.0045315	0.532196	4.4225	-38.0127	9.1824	4.38377
1998 Q3	163.5	80.7131	14250.3	4.19462	0.741284	11.1013	-0.00100407	1.5542	49.1292	2.65032	0.00221587	0.522397	3.95085	-33.1633	9.56453	4.3909
1998 Q4	164.4	80.6068	9511.1	4.20361	-0.0973761	11.1065	-0.0100807	0.629739	32.5426	2.45737	0.0011267	0.434312	3.78564	-49.8601	9.16022	4.38958
1999 Q1	164.8	81.9703	11074.9	4.21294	-1.22288	11.1138	-0.000788105	2.01016	-22.0574	2.72257	0.00241882	0.559729	3.47491	-1.56791	9.31244	4.40636
1999 Q2	166	82.6855	13018.2	4.22191	-3.48591	11.0832	0.000716827	3.12719	29.1706	3.16615	0.00590588	0.677248	3.50994	24.1025	9.47411	4.41504
1999 Q3	167.8	83.9077	5777.77	4.23303	-0.761117	11.0937	0.00852808	3.88158	-90.2761	3.77705	0.0108627	0.8282	3.84097	46.0826	8.66177	4.42972
1999 Q4	168.8	85.4031	7862.55	4.24217	-0.955054	11.097	0.0196748	5.77995	-19.0349	4.37497	0.0169851	1.04325	3.85568	87.6336	8.96987	4.44738
2000 Q1	171	86.3284	5832.33	4.25618	-0.330763	11.1105	0.0242944	5.18022	-64.1266	4.63311	0.0221472	1.11429	4.32413	68.8519	8.67117	4.45816
2000 Q2	172.2	87.6498	5569.94	4.26384	4.45852	11.1278	0.0336934	5.83051	-84.8968	4.3122	0.0237475	1.16134	4.19289	53.9294	8.62514	4.47335
2000 Q3	173.6	88.0469	13816.7	4.27286	5.17678	11.1455	0.0327764	4.81521	87.1858	3.51398	0.0220432	1.13028	3.98239	31.0964	9.53363	4.47787
2000 Q4	174.6	88.726	11881	4.27921	5.82351	11.1552	0.0353468	3.81711	41.2834	2.20638	0.0163633	1.02442	3.70402	-1.82139	9.3827	4.48555
2001 Q1	176.1	87.0922	22324.5	4.29003	3.30146	11.1435	0.0119188	0.880807	134.227	0.735683	0.00799173	0.964646	3.38545	-14.4211	10.0134	4.46697
2001 Q2	177.7	86.1673	13179.2	4.30399	-0.830355	11.1195	-0.00340221	-1.70593	86.1256	-0.335478	-9.94622e-05	1.01481	4.01511	-13.4871	9.4864	4.45629
2001 Q3	178.1	85.1264	25156	4.30877	-1.66362	11.1289	-0.0200844	-3.37327	59.9219	-0.970459	-0.00733042	0.87278	3.59122	-25.8535	10.1328	4.44414
2001 Q4	177.4	84.3021	23448.2	4.30987	-3.02079	11.125	-0.0343067	-5.11466	67.9848	-1.17537	-0.0144621	0.74746	3.06645	-31.5204	10.0625	4.43441
2002 Q1	178.5	85.6518	22597.4	4.32074	-3.20201	11.1115	-0.0229449	-1.66761	1.21479	-0.840019	-0.0191194	0.883322	3.07022	-8.80713	10.0256	4.45029
2002 Q2	179.6	86.487	17938.5	4.32776	-1.27601	11.1068	-0.0178403	0.370338	30.8306	-0.247822	-0.0211556	0.905656	2.37713	-11.3801	9.7947	4.45999
2002 Q3	180.8	87.1791	14136.5	4.33378	-1.36459	11.1152	-0.0145749	2.38276	-57.6338	0.362877	-0.0223487	0.975374	2.5011	11.1138	9.55651	4.46796
2002 Q4	181.8	87.0679	27832.9	4.33811	0.822585	11.1332	-0.0206824	3.22823	17.1425	1.27159	-0.0206258	1.09862	2.82333	38.5133	10.234	4.46669
2003 Q1	183.9	87.767	25718.6	4.35172	3.02347	11.1417	-0.0176557	2.43945	12.9382	1.94477	-0.0188991	1.0914	3.09794	21.1527	10.155	4.47469
2003 Q2	183.1	87.2703	34454.8	4.35153	2.81518	11.1349	-0.0284362	0.901622	65.2702	2.32691	-0.0175248	1.01238	2.37704	11.1401	10.4474	4.46901
2003 Q3	185.1	88.2724	23886.3	4.3573	2.81174	11.1433	-0.0222463	1.24631	52.455	2.61776	-0.0162314	0.91776	2.35204	-6.0886	10.0811	4.48043
2003 Q4	185.5	89.7596	12058.2	4.35817	4.01478	11.1734	-0.0108575	3.04464	-83.6472	2.66756	-0.0143943	1.1579	2.00668	5.25493	9.3975	4.49714
2004 Q1	187.1	90.4809	16122.3	4.3693	4.09484	11.1826	-0.00822011	3.04532	-46.7011	2.59411	-0.0137016	1.19192	1.75812	8.81059	9.68796	4.50514
2004 Q2	188.9	91.213	9975.34	4.37837	5.01707	11.1851	-0.00552166	4.41876	-123.953	2.81839	-0.0102581	1.24224	2.68458	20.4612	9.20787	4.5132
2004 Q3	189.8	91.4869	14397.8	4.38093	5.53787	11.1987	-0.00782257	3.57682	-50.6231	2.99245	-0.00723298	1.40081	2.3625	42.2871	9.57483	4.5162
2004 Q4	191.7	91.5045	13202.7	4.38557	3.05679	11.2039	-0.0128068	1.92533	9.06779	2.88949	-0.00623544	1.4558	2.73955	22.8949	9.48818	4.51639
2005 Q1	193.1	92.745	11537.9	4.3951	2.45905	11.2072	-0.00433158	2.47155	-33.4567	3.07151	-0.0033052	1.76926	2.58026	39.4991	9.35339	4.52985
2005 Q2	193.7	93.4891	11867	4.40027	2.95203	11.2146	-0.00107062	2.46473	17.3644	2.99618	5.31958e-05	1.81242	2.18936	37.7745	9.38152	4.53784
2005 Q3	198.8	93.6379	20193.7	4.41314	0.899461	11.2077	-0.00387473	2.32392	33.8296	3.09027	0.00495488	2.0064	3.22165	35.9291	9.91313	4.53943
2005 Q4	198.1	95.5436	12165.6	4.4113	0.678949	11.2107	0.0122916	4.31944	-8.18089	3.449	0.0107535	2.04014	2.57273	33.7463	9.40637	4.55958
2006 Q1	199.7	96.4253	11552.8	4.42064	0.00581435	11.2073	0.0179871	3.89151	0.129316	3.62914	0.0169798	2.07506	2.55451	15.9431	9.35469	4.56877
2006 Q2	201.8	97.5338	8235.16	4.43209	-1.18176	11.2028	0.0264892	4.23544	-36.5347	3.77814	0.023596	2.15726	3.18245	17.4174	9.01617	4.5802
2006 Q3	202.8	97.8855	11854.7	4.43476	0.294479	11.2107	0.0277832	4.43641	-53.2649	3.84265	0.0311632	1.998	2.16215	-0.419656	9.38048	4.5838
2006 Q4	203.1	99.1772	9051.43	4.43465	-0.441338	11.2063	0.0392528	3.73254	-29.5692	3.66511	0.0374243	2.15691	2.3353	5.56591	9.11068	4.59691
2007 Q1	205.288	99.8677	13357.5	4.44544	-0.586106	11.2014	0.0452426	3.50771	14.5148	3.45775	0.0439809	2.03012	2.47953	-2.18968	9.49983	4.60385
2007 Q2	207.234	100.279	18459.6	4.45563	-0.384626	11.1989	0.0490959	2.77549	80.7173	3.095	0.0494711	2.06363	2.3533	-4.43698	9.82334	4.60795
2007 Q3	208.547	100.944	21867.7	4.45867	-1.23489	11.1983	0.0561192	3.07665	61.2288	2.44444	0.0530468	2.43199	2.39033	19.6562	9.99277	4.61457
2007 Q4	211.445	101.627	13843.7	4.46863	0.544933	11.2117	0.0638833	2.44	42.4906	1.30793	0.0503683	3.03545	3.39854	34.1682	9.53558	4.62131
2008 Q1	213.448	101.576	13176.9	4.48134	2.1135	11.2226	0.0649208	1.6962	-1.36158	-1.06684	0.035399	3.26698	3.59016	47.5773	9.48622	4.62081
2008 Q2	217.463	100.161	18019	4.4999	2.12647	11.2202	0.0528133	-0.117536	-2.41556	-4.15108	0.011942	3.7705	4.42699	60.2739	9.79918	4.60678
2008 Q3	218.877	96.7698	14048.1	4.50293	1.93951	11.2177	0.0205027	-4.22303	-44.252	-6.86751	-0.0101959	3.05172	4.42621	22.6996	9.55025	4.57234
2008 Q4	211.398	89.135	13245.4	4.48484	0.0402813	11.2122	-0.0595423	-13.1157	-4.4177	-8.55806	-0.0288678	1.39438	1.6204	-77.7913	9.49141	4.49015
2009 Q1	212.495	84.1555	21794.1	4.49116	-3.00491	11.1925	-0.115103	-18.8142	50.3177	-8.79515	-0.045889	1.48812	0.982301	-78.6355	9.9894	4.43267
2009 Q2	214.79	85.4042	18972.1	4.49936	-2.63645	11.1938	-0.0988456	-15.9384	5.15384	-7.57595	-0.0574336	2.01947	-0.0536764	-62.4371	9.85072	4.4474
2009 Q3	215.861	88.0933	14507.2	4.50041	-1.42751	11.2034	-0.0668203	-9.39387	3.21578	-5.71308	-0.061775	2.14286	-0.251875	-35.3565	9.5824	4.4784
2009 Q4	217.347	89.1676	18951.8	4.50309	-0.14498	11.2107	-0.0542275	0.0366272	35.8247	-2.90217	-0.0536341	2.43712	1.82546	55.8369	9.84965	4.49052
2010 Q1	217.353	91.5454	19711.9	4.51154	2.26523	11.2152	-0.0279988	8.41685	-10.0417	0.724954	-0.0360228	2.43493	2.03789	49.2406	9.88898	4.51683
2010 Q2	217.199	93.2763	21449	4.51394	2.03804	11.2142	-0.0098876	8.81706	12.2712	3.39172	-0.0227444	2.19524	1.45846	8.34553	9.97343	4.53557
2010 Q3	218.275	94.0666	19653.4	4.51665	1.13967	11.2148	-0.00255598	6.56066	30.3604	5.03267	-0.0125964	2.3623	1.62438	9.74951	9.88601	4.544
2010 Q4	220.472	95.2281	14901.6	4.52265	1.42246	11.2249	0.00817596	6.57573	-24.0427	5.3398	-0.00327071	2.86261	1.95605	16.0916	9.60923	4.55628
2011 Q1	223.046	94.0781	13397.8	4.53682	1.37955	11.229	-0.00589663	2.729	-38.613	4.35339	0.00270159	3.23114	2.52815	28.2917	9.50285	4.54412
2011 Q2	224.806	95.2489	14121	4.54352	-0.0580767	11.2136	0.00421571	2.09277	-41.8016	3.49163	0.00574584	3.0543	2.95762	33.0258	9.55542	4.55649
2011 Q3	226.597	96.146	20227.6	4.5483	0.976346	11.2246	0.0110523	2.18653	2.87936	2.75339	0.00707558	2.98838	3.16444	23.5096	9.9148	4.56587
2011 Q4	227.223	96.6789	19437	4.5508	1.31084	11.238	0.0138074	1.51195	26.5706	1.75835	0.00520036	3.19761	2.8146	11.0672	9.87493	4.57139
2012 Q1	228.807	96.7347	18629.9	4.56299	2.07648	11.2497	0.0114221	2.78475	32.9674	1.27247	0.0052411	3.4256	2.61604	5.84414	9.83252	4.57197
2012 Q2	228.524	96.585	36827.9	4.56342	3.36683	11.2473	0.00675222	1.39299	95.8592	0.961677	0.00426933	2.60398	1.98964	-15.9508	10.514	4.57042
2012 Q3	231.015	95.7722	25945.2	4.57029	1.82573	11.2428	-0.0049506	-0.389557	24.8942	0.73401	0.00256457	3.05764	2.19901	2.29107	10.1637	4.56197
2012 Q4	231.221	96.0312	38752.3	4.56933	1.18522	11.2499	-0.00561143	-0.672129	69.0012	0.833938	0.00106738	3.05915	1.85278	-4.42653	10.5649	4.56467
2013 Q1	232.282	96.6547	31598.9	4.57875	-0.716382	11.2426	-0.00258669	-0.0828058	52.8356	0.793216	0.00020546	2.97807	1.57677	-14.0001	10.3609	4.57114
2013 Q2	232.445	97.1593	14113.9	4.58143	0.0237605	11.2476	-0.000881026	0.592862	-95.9095	0.999946	0.000923135	2.79936	1.80126	7.23488	9.55492	4.57635
2013 Q3	233.544	97.9138	15802.5	4.58523	0.771766	11.2506	0.00332706	2.21145	-49.5818	1.40299	0.00298352	3.06434	1.49406	0.219087	9.66793	4.58409
2013 Q4	234.719	98.462	18492	4.58567	0.342556	11.2533	0.00538869	2.4997	-73.9851	1.74778	0.00477842	3.16228	1.63404	3.31552	9.82509	4.58967
2014 Q1	236.028	99.4391	19536.9	4.59453	1.98042	11.2624	0.0117759	2.8401	-48.082	2.02503	0.00663947	3.02293	1.5779	1.4951	9.88006	4.59955
2014 Q2	237.231	99.551	20086.1	4.60201	1.20987	11.2597	0.00947208	2.43178	35.2868	2.02499	0.00740799	2.96302	2.05813	5.68178	9.90778	4.60067
2014 Q3	237.477	99.6338	14211.2	4.60278	2.15479	11.2721	0.00695289	1.74139	-10.614	1.78343	0.00719525	2.64877	1.75469	-14.5739	9.56178	4.6015
2014 Q4	236.252	100.308	17252	4.59706	4.09499	11.2943	0.0104407	1.85792	-6.94095	1.5425	0.00680076	1.81322	1.13927	-55.619	9.75568	4.60825
2015 Q1	235.976	100.03	29838.2	4.60152	3.21779	11.2945	0.0044986	0.592569	42.3487	0.998477	0.00350288	1.5548	0.698331	-66.4879	10.3035	4.60547
2015 Q2	237.657	100.071	25360.7	4.60909	3.84417	11.2981	0.00183791	0.520563	23.3174	0.603332	0.000644942	1.66447	0.708408	-57.6702	10.141	4.60588
2015 Q3	237.498	100.447	21280.5	4.60817	3.3167	11.3053	0.00262724	0.813141	40.376	0.323783	-0.0020101	1.27716	0.539655	-72.9452	9.96555	4.60963
2015 Q4	237.761	99.3421	18517.9	4.6067	1.46711	11.3089	-0.0113092	-0.968023	7.08086	0.00674291	-0.00520496	1.08647	0.963653	-51.2168	9.82649	4.59857
2016 Q1	238.08	99.6963	22826.1	4.61093	1.14653	11.306	-0.0105335	-0.334234	-26.7886	0.168197	-0.00650702	1.09236	0.941415	-35.3004	10.0357	4.60213
2016 Q2	240.222	99.8552	18513.2	4.61918	-0.944854	11.2886	-0.0116324	-0.215451	-31.4718	0.357954	-0.00707293	1.29155	1.00831	-25.3668	9.82624	4.60372
2016 Q3	241.176	100.085	30182.3	4.62102	-0.772168	11.2976	-0.0119234	-0.361365	34.9466	0.617216	-0.00671955	1.22807	1.28453	-3.91959	10.315	4.60602
2016 Q4	242.637	101.068	32031.3	4.62535	0.929937	11.3182	-0.00461582	1.72275	54.7976	1.15683	-0.00406809	1.52153	1.86571	33.6781	10.3745	4.6158
2017 Q1	243.892	101.557	29910.1	4.63435	-0.346839	11.3025	-0.00212341	1.84886	27.0293	1.73082	0.000870162	1.44783	2.34236	28.1719	10.306	4.62062
2017 Q2	244.163	102.514	16514.3	4.63886	1.082	11.2995	0.00510091	2.62797	-11.4255	2.21494	0.00571142	1.2395	1.96836	-4.11345	9.71198	4.63
2017 Q3	246.435	102.936	16325.6	4.64467	1.00161	11.3076	0.00725094	2.80929	-61.452	2.65425	0.0110999	1.41771	2.36479	14.3595	9.70049	4.63411
2017 Q4	247.805	104.861	28396.6	4.64869	-0.667205	11.3116	0.0240343	3.68368	-12.0446	2.68741	0.0148039	1.71339	2.33314	11.8759	10.254	4.65263
2018 Q1	249.577	104.831	13622.2	4.65705	1.56805	11.3182	0.0222564	3.1734	-78.6499	2.41963	0.0178554	1.7613	2.26938	19.5988	9.51945	4.65235
2018 Q2	251.018	105.334	25653.2	4.66646	1.61123	11.3156	0.0257961	2.71376	44.044	2.03575	0.0196989	1.89822	2.7595	42.621	10.1524	4.65714
2018 Q3	252.182	104.969	28710.8	4.67345	2.09461	11.3285	0.0213117	1.95489	56.4537	1.49612	0.0205512	1.98395	2.87889	33.605	10.265	4.65366
2018 Q4	252.767	104.834	26443	4.67239	3.12612	11.3428	0.0192372	-0.025622	-7.12746	0.943353	0.0195669	1.47143	2.37012	-15.2242	10.1827	4.65238
2019 Q1	254.277	104.769	36588	4.67966	0.100408	11.3192	0.0180056	-0.0591772	98.8023	0.326578	0.0172239	1.69105	2.26099	-4.07002	10.5075	4.65176
2019 Q2	255.213	104.319	40489	4.68713	-0.359447	11.312	0.0132168	-0.968129	45.6362	-1.03467	0.00611347	1.54226	2.06717	-20.7664	10.6088	4.64746
2019 Q3	256.43	104.774	32801	4.69015	-2.12074	11.3073	0.0171446	-0.185659	13.3186	-2.86778	-0.0108698	1.5669	1.66979	-23.5992	10.3982	4.6518
2019 Q4	258.63	103.641	52716.3	4.69387	-1.53103	11.3275	0.00585556	-1.14402	68.9931	-3.51743	-0.0180574	1.69953	2.148	14.4117	10.8727	4.64094
2020 Q1	258.15	97.867	55684.7	4.69707	0.130608	11.3205	-0.0519772	-6.815	41.9985	-3.65993	-0.0217549	0.827058	1.74113	-71.5231	10.9275	4.58361
2020 Q2	257.004	93.568	28914.4	4.69767	-9.05624	11.2214	-0.0975708	-10.8769	-33.6693	-2.706	-0.0234747	1.0029	1.05375	-43.0353	10.2721	4.53869
2020 Q3	259.951	100.09	27497.7	4.70273	-11.8344	11.189	-0.0310763	-4.57314	-17.6355	-1.17117	-0.0254494	1.05891	1.25797	-39.1859	10.2219	4.60607
2020 Q4	262.005	102.552	22319.6	4.70615	-10.8223	11.2193	-0.00787705	-1.05669	-85.9458	-0.669083	-0.0281009	1.30533	1.22866	-26.3891	10.0132	4.63037
2021 Q1	264.91	103.617	11888.7	4.72091	-8.93799	11.2312	0.00117826	5.70937	-154.411	0.771763	-0.0179641	1.58004	2.38376	64.7329	9.38335	4.6407
2021 Q2	270.664	103.987	18072.8	4.73732	1.73035	11.2387	0.00332191	10.5582	-46.993	2.69294	-0.00107394	1.70508	3.96525	53.0716	9.80216	4.64427
2021 Q3	273.887	102.491	21508.6	4.74776	7.05064	11.2595	-0.0127051	2.37055	-24.5652	3.71984	0.00665031	1.82816	4.50236	54.6069	9.97621	4.62978
2021 Q4	280.808	105.962	19802.7	4.76944	6.41108	11.2834	0.0189804	3.27092	-11.965	4.4022	0.00872565	1.83519	6.32856	34.0692	9.89357	4.66308
2022 Q1	287.553	106.316	26455	4.8046	6.19163	11.2931	0.0206602	2.57134	79.9855	4.21546	0.00980384	2.54838	8.36897	47.8009	10.1832	4.66642
2022 Q2	294.996	106.743	29343.6	4.83544	4.21389	11.2809	0.0229935	2.61518	48.4667	3.30936	0.0107298	2.52332	9.81215	39.1963	10.2868	4.67042
